# Supplementary material
Source: publisher figshare collection journal article supplement (https://acs.figshare.com/ndownloader/files/17302343)
Supplement: Supplementary file 1 [file 17302343]

## Supporting Information

# Low-leakage fiber-based field-effect transistors with an Al<sub>2</sub>O<sub>3</sub>-MgO nanolaminate as gate insulator

*Jeong Woo Park<sup>1§</sup>, Seonil Kwon<sup>1§</sup>, Jeong Hyun Kwon<sup>1</sup>, Chan Young Kim<sup>1</sup>, and Kyung Cheol Choi<sup>1\*</sup>*

<sup>1</sup>School of Electrical Engineering, Korea Advanced Institute of Science and Technology (KAIST),  
291 Daehak-ro, Yuseong-gu, Daejeon 34141, Republic of Korea

\* Author to whom correspondence should be addressed.

Email address: kyungcc@kaist.ac.kr

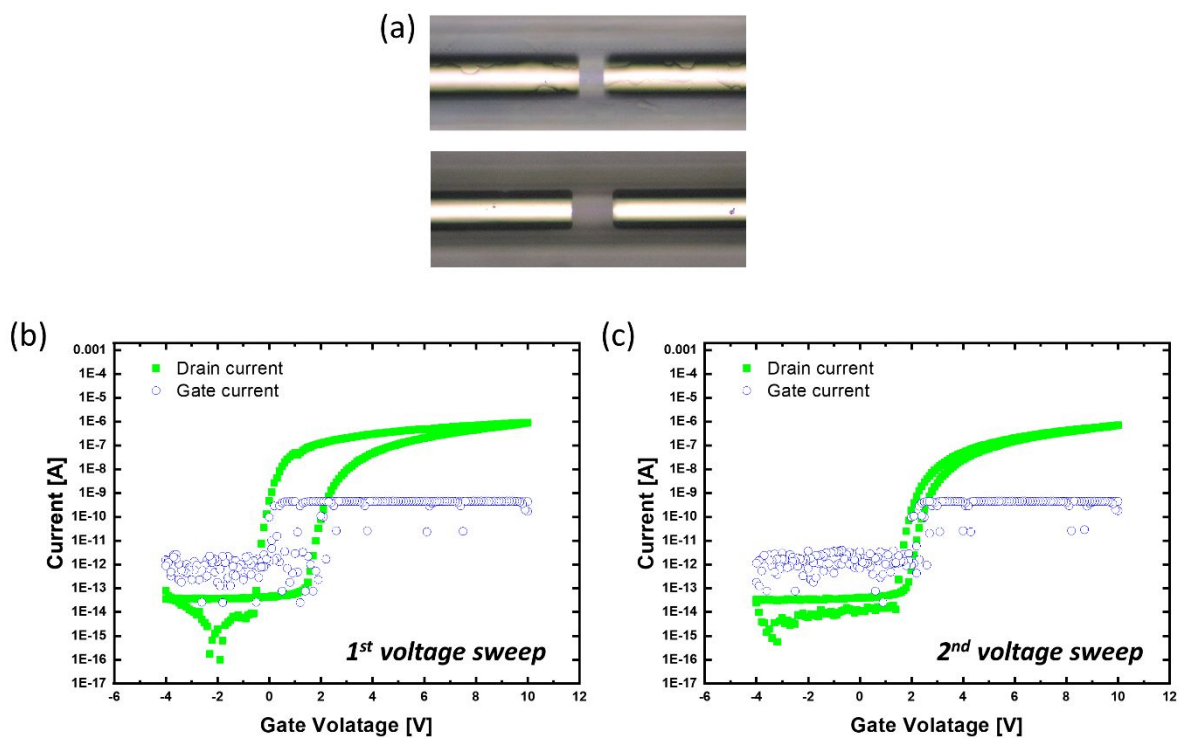

**Figure S1.** a) Microscopic images of the surfaces of fibers planarized by SU-8 2000.5/Al<sub>2</sub>O<sub>3</sub> (top) and PVA/Al<sub>2</sub>O<sub>3</sub> (bottom). 40-nm-thick Ti electrodes were deposited on the planarized fibers to appear the surface morphologies of the fibers explicitly. Changes of transfer curves of fiber-based TFTs b) at the first sweep and c) thereafter.
